# Supplementary material
Source: MDPI journal article supplement (https://www.mdpi.com/2076-3298/11/4/76)
Supplement: s1 [file s1]

## Supplementary materials

**Table S1.** Papers on arthropods, bats and birds used to understand how green roofs and walls can contribute to urban biodiversity.

| Paper Type | Year | Reference                                                                                                                                                                                        | Green roofs | Green walls |
|------------|------|--------------------------------------------------------------------------------------------------------------------------------------------------------------------------------------------------|-------------|-------------|
| Case study | 2006 | Schrader, S. & Boning, M. Soil formation on green roofs and its contribution to urban biodiversity with emphasis on Collembolans. <i>Pedobiologia</i> . [39]                                     | 1           | 0           |
| Review     | 2010 | Fernandez-Canero, R. & Gonzalez-Redondo, P. Green Roofs as a Habitat for Birds: A Review. <i>Journal of Animal and Veterinary Advances</i> . [40]                                                | 1           | 0           |
| Case study | 2011 | Tonietto, R. et al. A comparison of bee communities of Chicago green roofs, parks and prairies. <i>Landscape and Urban Planning</i> . [30]                                                       | 1           | 0           |
| Case study | 2011 | MacIvor, J.S. & Lundholm, J. Insect species composition and diversity on intensive green roofs and adjacent level-ground habitats. <i>Urban Ecosystems</i> . [41]                                | 1           | 0           |
| Case study | 2011 | Snep, R.P.H. et al. Conservation where people work: A role for business districts and industrial areas in enhancing endangered butterfly populations? <i>Landscape and Urban Planning</i> . [42] | 1           | 0           |
| Case study | 2012 | Pearce, H., & Walters, C. L. Do green roofs provide habitat for bats in urban areas? <i>Acta Chiropterologica</i> . [43]                                                                         | 1           | 0           |
| Case study | 2013 | Chiquet, C. et al. Birds and the urban environment: the value of green walls. <i>Urban Ecosystems</i> . [18]                                                                                     | 0           | 1           |
| Case study | 2013 | Rumble, H. & Gange, A.C. Soil microarthropod community dynamics in extensive green roofs. <i>Ecological Engineering</i> . [44]                                                                   | 1           | 0           |
| Case study | 2013 | Madre, F. et al. A comparison of 3 types of green roof as habitats for arthropods. <i>Ecological Engineering</i> . [45]                                                                          | 1           | 0           |
| Case study | 2014 | Benvenuti, S. Wildflower green roofs for urban landscaping, ecological sustainability and biodiversity. <i>Landscape and Urban Planning</i> . [46]                                               | 1           | 0           |
| Case study | 2014 | Nagase, A. & Nomura, M. An evaluation of one example of biotope roof in Japan: Plant development and invertebrate colonisation after 8 years. <i>Urban Forestry &amp; Urban Greening</i> . [47]  | 1           | 0           |
| Case study | 2014 | Muller, J.N. et al. Diverse urban plantings managed with sufficient resource availability can increase plant productivity and arthropod diversity. <i>Frontiers in Plant Science</i> . [48]      | 1           | 0           |
| Review     | 2014 | Williams, N. et al. Do green roofs help urban biodiversity conservation? <i>Journal of Applied Ecology</i> . [49]                                                                                | 1           | 0           |

| <b>Paper Type<br/>(cont.)</b> | <b>Year</b> | <b>Reference</b>                                                                                                                                                                         | <b>Green<br/>roofs</b> | <b>Green<br/>walls</b> |
|-------------------------------|-------------|------------------------------------------------------------------------------------------------------------------------------------------------------------------------------------------|------------------------|------------------------|
| <b>Case study</b>             | 2014        | Braaker, S. et al. Habitat connectivity shapes urban arthropod communities: the key role of green roofs. <i>Ecology</i> . [50]                                                           | 1                      | 0                      |
| <b>Case study</b>             | 2015        | Madre, F. et al. Building biodiversity: Vegetated facades as habitats for spider and beetle assemblages. <i>Global Ecology and Conservation</i> . [35]                                   | 0                      | 1                      |
| <b>Case study</b>             | 2015        | Eakin Carly, J. et al. Avian response to green roofs in urban landscapes in the Midwestern USA. <i>Wildlife Society Bulletin</i> . [25]                                                  | 1                      | 0                      |
| <b>Case study</b>             | 2015        | Parkins, K. L., & Clark, J. A. Green roofs provide habitat for urban bats. <i>Global Ecology and Conservation</i> . [51]                                                                 | 1                      | 0                      |
| <b>Case study</b>             | 2016        | Nash, C. et al. Initial insights on the biodiversity potential of biosolar roofs: a London Olympic Park green roof case study. <i>Israel Journal of Ecology &amp; Evolution</i> . [52]   | 1                      | 0                      |
| <b>Case study</b>             | 2016        | MacIvor, J.S. Building height matters: nesting activity of bees and wasps on vegetated roofs. <i>Israel Journal of Ecology &amp; Evolution</i> . [53]                                    | 1                      | 0                      |
| <b>Case study</b>             | 2016        | Washburn Brian, E. et al. Composition and diversity of avian communities using a new urban habitat: green roofs. <i>Environmental Management</i> . [54]                                  | 1                      | 0                      |
| <b>Case study</b>             | 2016        | Wong Gwendolyn. K.L. & Jim, C.Y. Do vegetated rooftops attract more mosquitoes? Monitoring disease vector abundance on urban green roofs. <i>Science of the Total Environment</i> . [55] | 1                      | 0                      |
| <b>Case study</b>             | 2017        | Deng, H.J. & Jim, C.Y. Spontaneous plant colonization and bird visits of tropical extensive green roof. <i>Urban Ecosystems</i> . [24]                                                   | 1                      | 0                      |
| <b>Case study</b>             | 2017        | Wang, J.W. et al. Building biodiversity: drivers of bird and butterfly diversity on tropical urban roof gardens. <i>Ecosphere</i> . [33]                                                 | 1                      | 0                      |
| <b>Case study</b>             | 2017        | Fairbrass, A.J. et al. Biases of acoustic indices measuring biodiversity in urban areas. <i>Ecological Indicators</i> . [56]                                                             | 1                      | 0                      |
| <b>Case study</b>             | 2017        | Braaker, S. et al. Habitat connectivity and local conditions shape taxonomic and functional diversity of arthropods on green roofs. <i>Journal of Animal Ecology</i> . [29]              | 1                      | 0                      |
| <b>Case study</b>             | 2017        | Rumble, H. & Gange, A.C. Microbial inoculants as a soil remediation tool for extensive green roofs. <i>Ecological Engineering</i> . [57]                                                 | 1                      | 0                      |
| <b>Review</b>                 | 2017        | Blank, L. et al. Horizontal and vertical island biogeography of arthropods on green roofs: a review. <i>Urban Ecosystems</i> . [58]                                                      | 1                      | 1                      |
| <b>Case study</b>             | 2018        | Partridge, D.R. & Clark, J.A. Urban green roofs provide habitat for migrating and breeding birds and their arthropod prey. <i>PLOS ONE</i> . [32]                                        | 1                      | 0                      |

| Paper Type<br>(cont.) | Year | Reference                                                                                                                                                                                                                                       | Green<br>roofs | Green<br>walls |
|-----------------------|------|-------------------------------------------------------------------------------------------------------------------------------------------------------------------------------------------------------------------------------------------------|----------------|----------------|
| Case study            | 2018 | Kyrö, K. et al. Local habitat characteristics have a stronger effect than the surrounding urban landscape on beetle communities on green roofs. <i>Urban Forestry &amp; Urban Greening</i> . [19]                                               | 1              | 0              |
| Case study            | 2018 | Salman, I.N.A. & Blaustein, L. Vegetation cover drives arthropod communities in Mediterranean/Subtropical green roof habitats. <i>Sustainability</i> . [26]                                                                                     | 1              | 0              |
| Case study            | 2018 | Joimel, S. et al. Are <i>Collembola</i> flying onto green roofs? <i>Ecological Engineering</i> . [59]                                                                                                                                           | 1              | 0              |
| Case study            | 2018 | Schindler, B.Y. et al. Green roof and photovoltaic panel integration: Effects on plant and arthropod diversity and electricity production. <i>Journal of Environmental Management</i> . [60]                                                    | 1              | 0              |
| Case study            | 2018 | Rumble, H. et al. Green roof soil organisms: Anthropogenic assemblages or natural communities? <i>Applied Soil Ecology</i> . [61]                                                                                                               | 1              | 0              |
| Case study            | 2018 | Kratschmer, S. et al. Buzzing on top: Linking wild bee diversity, abundance and traits with green roof qualities. <i>Urban Ecosystems</i> . [62]                                                                                                | 1              | 0              |
| Case study            | 2018 | Petremand, G. et al. Ground beetle (Coleoptera: Carabidae) communities on green roofs in Switzerland: synthesis and perspectives. <i>Urban Ecosystems</i> . [63]                                                                                | 1              | 0              |
| Case study            | 2018 | Nagase, A. et al. Patterns in urban butterflies and spontaneous plants across a university campus in Japan. <i>Pan-Pacific Entomologist</i> . [64]                                                                                              | 1              | 0              |
| Review                | 2018 | Hofmann Michaela, M. et al. Bee species recorded between 1992 and 2017 from green roofs in Asia, Europe, and North America, with key characteristics and open research questions. <i>Apidologie</i> . [65]                                      | 1              | 0              |
| Case study            | 2018 | Wong, G. K., & Jim, C. Y. Abundance of urban male mosquitoes by green infrastructure types: implications for landscape design and vector management. <i>Landscape ecology</i> . [66]                                                            | 1              | 0              |
| Case study            | 2019 | Belcher, R.N. et al. Vegetation on and around large-scale buildings positively influences native tropical bird abundance and bird species richness. <i>Urban Ecosystems</i> . [31]                                                              | 1              | 1              |
| Case study            | 2019 | Schindler, B.Y. et al. Fine-scale substrate heterogeneity does not affect arthropod communities on green roofs. <i>PeerJ</i> . [67]                                                                                                             | 1              | 0              |
| Case study            | 2019 | Ksiazek-Mikenas, K. et al. Pollinator-mediated gene flow connects green roof populations across the urban matrix: A paternity analysis of the self-compatible forb <i>Penstemon hirsutus</i> . <i>Frontiers in Ecology and Evolution</i> . [68] | 1              | 0              |
| Review                | 2019 | Filazzola, A. et al. The contribution of constructed green infrastructure to urban biodiversity: A synthesis and meta-analysis. <i>Journal of Applied Ecology</i> . [21]                                                                        | 1              | 1              |
| Paper Type<br>(cont.) | Year | Reference                                                                                                                                                                                                                                       | Green<br>roofs | Green<br>walls |

|                           |             |                                                                                                                                                                                                                                   |                    |                    |
|---------------------------|-------------|-----------------------------------------------------------------------------------------------------------------------------------------------------------------------------------------------------------------------------------|--------------------|--------------------|
| <b>Case study</b>         | 2020        | Dominguez, M.V.S. et al. Arthropod diversity and ecological processes on green roofs in a semi-rural area of Argentina: Similarity to neighbour ground habitats and landscape effects. <i>Landscape and Urban Planning</i> . [69] | 1                  | 0                  |
| <b>Case study</b>         | 2020        | Partridge, D.R. et al. Bat activity correlates with moth abundance on an urban green roof. <i>Northeastern Naturalist</i> [70]                                                                                                    | 1                  | 0                  |
| <b>Case study</b>         | 2020        | Passaseo, A. et al. Pollinator emerging from extensive green roofs: wild bees (Hymenoptera, Anthophila) and hoverflies (Diptera, Syrphidae) in Geneva (Switzerland). <i>Urban Ecosystems</i> . [71]                               | 1                  | 0                  |
| <b>Case study</b>         | 2020        | Dusza, Y. et al. Plant-pollinator interactions on green roofs are mediated by substrate characteristics and plant community composition. <i>Acta Oecologica-International Journal of Ecology</i> . [72]                           | 1                  | 0                  |
| <b>Case study</b>         | 2020        | Kyrö, K. et al. Vegetated roofs in boreal climate support mobile open habitat arthropods, with differentiation between meadow and succulent roofs. <i>Urban Ecosystems</i> . [27]                                                 | 1                  | 0                  |
| <b>Case study</b>         | 2021        | Fabian, D. et al. Towards the design of biodiverse green roofs in Argentina: Assessing key elements for different functional groups of arthropods. <i>Urban Forestry &amp; Urban Greening</i> . [73]                              | 1                  | 0                  |
| <b>Case study</b>         | 2021        | Baek, K. Y. et al. Analysis of changes in suitable habitat areas of Paridae through rooftop greening simulation—Case study of Suwon-si, Gyeonggi-do, Republic of Korea. <i>Sustainability</i> . [74]                              | 1                  | 0                  |
| <b>Case study</b>         | 2022        | Partridge, D.R.R. & Clark, J.A. Small urban green roof plots near larger green spaces may not provide additional habitat for birds. <i>Frontiers in Ecology and Evolution</i> . [36]                                              | 1                  | 0                  |
| <b>Case study</b>         | 2022        | Baek, K.Y. & Kim, H.G. Analyzing the efficiency of increasing suitable habitat area for Paridae by roof greening method based on building type: Case study of Suwon City, Republic of Korea. <i>Sensor and Materials</i> . [75]   | 1                  | 0                  |
| <b>Case study</b>         | 2022        | Ivan, E.S. et al. Green wall impact on beneficial insects in an urban fruit ecosystem. <i>Scientific Papers-Series B-Horticulture</i> . [34]                                                                                      | 0                  | 1                  |
| <b>Review</b>             | 2022        | Wang, L.W. et al. The relationship between green roofs and urban biodiversity: a systematic review. <i>Biodiversity and Conservation</i> . [76]                                                                                   | 1                  | 0                  |
| <b>Case study</b>         | 2022        | Rumble, H. et al. Can microbial inoculants boost soil food webs and vegetation development on newly constructed extensive green roofs? <i>Urban Forestry &amp; Urban Greening</i> . [77]                                          | 1                  | 0                  |
| <b>Case study</b>         | 2022        | Diethelm, A.C. & Masta, S.E. Urban green roofs can support a diversity of parasitoid wasps. <i>Frontiers in Ecology and Evolution</i> . [78]                                                                                      | 1                  | 0                  |
| <b>Case study</b>         | 2022        | Joimel, S. et al. One green roof type, one Technosol, one ecological community. <i>Ecological Engineering</i> [79]                                                                                                                | 1                  | 0                  |
| <b>Case study</b>         | 2022        | Wooster, E.I.F. et al. Urban green roofs promote metropolitan biodiversity: A comparative case study. <i>Building and Environment</i> . [80]                                                                                      | 1                  | 0                  |
| <b>Paper Type (cont.)</b> | <b>Year</b> | <b>Reference</b>                                                                                                                                                                                                                  | <b>Green roofs</b> | <b>Green walls</b> |

|                           |             |                                                                                                                                                                                                                        |                    |                    |
|---------------------------|-------------|------------------------------------------------------------------------------------------------------------------------------------------------------------------------------------------------------------------------|--------------------|--------------------|
| <b>Case study</b>         | 2022        | Gonsalves, S. et al. The effect of urban green roof design on beetle biodiversity. <i>Urban Ecosystems</i> . [81]                                                                                                      | 1                  | 0                  |
| <b>Case study</b>         | 2022        | Jacobs, J. et al. Biodiversity of collembola on green roofs: A case study of three cities in Belgium. <i>Ecological Engineering</i> . [82]                                                                             | 1                  | 0                  |
| <b>Case study</b>         | 2022        | Lin, B.S. & Chen, T.W. The plant and faunal species composition and diversity on rooftop farms: Seasonal variation and the effects of site and surrounding characteristics. <i>Landscape and Urban Planning</i> . [83] | 1                  | 0                  |
| <b>Case study</b>         | 2022        | Kyrö, K. et al. Arthropod communities on young vegetated roofs are more similar to each other than to communities at ground level. <i>Frontiers in Ecology and Evolution</i> . [37]                                    | 1                  | 0                  |
| <b>Case study</b>         | 2022        | Ridzuan, N.H. et al. Insect biodiversity of urban green spaces in Penang Island, Malaysia. <i>International Journal of Tropical Insect Science</i> . [84]                                                              | 1                  | 1                  |
| <b>Case study</b>         | 2023        | Boeing, J. et al. Ant species richness in the urban mosaic: size is more important than location. <i>Urban Ecosystems</i> . [85]                                                                                       | 1                  | 0                  |
| <b>Case study</b>         | 2023        | Jacobs, J. et al. Macro-invertebrate abundance on green roofs versus ground level sites in the city of Antwerp, Belgium. <i>Belgian Journal of Zoology</i> . [86]                                                      | 1                  | 0                  |
| <b>Case study</b>         | 2023        | Riehn Jordyn, K. et al. Bee diversity on urban rooftop food gardens. <i>Frontiers in Sustainable Cities</i> . [87]                                                                                                     | 1                  | 0                  |
| <b>Case study</b>         | 2023        | Hussain, R.I. et al. More insect species are supported by green roofs near public gardens. <i>Journal of Insect Conservation</i> . [88]                                                                                | 1                  | 0                  |
| <b>Case study</b>         | 2023        | Fenoglio, M.S. et al. Native plants on experimental urban green roofs support higher community-level insect abundance than exotics. <i>Urban Forestry &amp; Urban Greening</i> . [89]                                  | 1                  | 0                  |
| <b>Case study</b>         | 2023        | Berthon, K. et al. Floral resources encourage colonisation and use of green roofs by invertebrates. <i>Urban Ecosystems</i> . [90]                                                                                     | 1                  | 0                  |
| <b>Case study</b>         | 2023        | MacKinnon, M. et al. Improving urban habitat connectivity for native birds: using least-cost path analyses to design urban green infrastructure networks. <i>Land</i> . [91]                                           | 1                  | 0                  |
| <b>Case study</b>         | 2023        | Van Dijk, T. et al. Sedum as host plants for caterpillars? Introducing gut content metabarcoding to green roof research. <i>Urban Ecosystems</i> . [92]                                                                | 1                  | 0                  |
| <b>Case study</b>         | 2023        | Jacobs, J. et al. Green roofs and pollinators, useful green spots for some wild bee species (Hymenoptera: Anthophila), but not so much for hoverflies (Diptera: Syrphidae). <i>Scientific Reports</i> . [93]           | 1                  | 0                  |
| <b>Case study</b>         | 2023        | Durà, V.B. et al. Contribution of green roofs to urban arthropod biodiversity in a Mediterranean climate: A case study in València, Spain. <i>Building and Environment</i> . [94]                                      | 1                  | 0                  |
| <b>Paper Type (cont.)</b> | <b>Year</b> | <b>Reference</b>                                                                                                                                                                                                       | <b>Green roofs</b> | <b>Green walls</b> |

|                   |      |                                                                                                                                                             |   |   |
|-------------------|------|-------------------------------------------------------------------------------------------------------------------------------------------------------------|---|---|
| <b>Review</b>     | 2023 | Coulibaly, S.F. et al. The role of green roofs as urban habitats for biodiversity modulated by their design: A review. Environmental Research Letters. [22] | 1 | 0 |
| <b>Case study</b> | 2024 | McNamara Manning, K. et al. Insect pollinator and natural enemy communities in green roof and ground-level urban habitats. Urban Ecosystems. [95]           | 1 | 0 |
