# Supplementary material
Source: MDPI journal article supplement (https://www.mdpi.com/2076-3298/11/4/76)
Supplement: s1 [file s1]

Archive with 1 entries (1 files):
- environments-2876628-supplementary.pdf
